# Supplementary figures and images for: Spatial and Temporal Pattern of Net Ecosystem Productivity in China and Its Response to Climate Change in the Past 40 Years
Source: MDPI journal article supplement (doi:10.3390/ijerph20010092), 2022-12-21

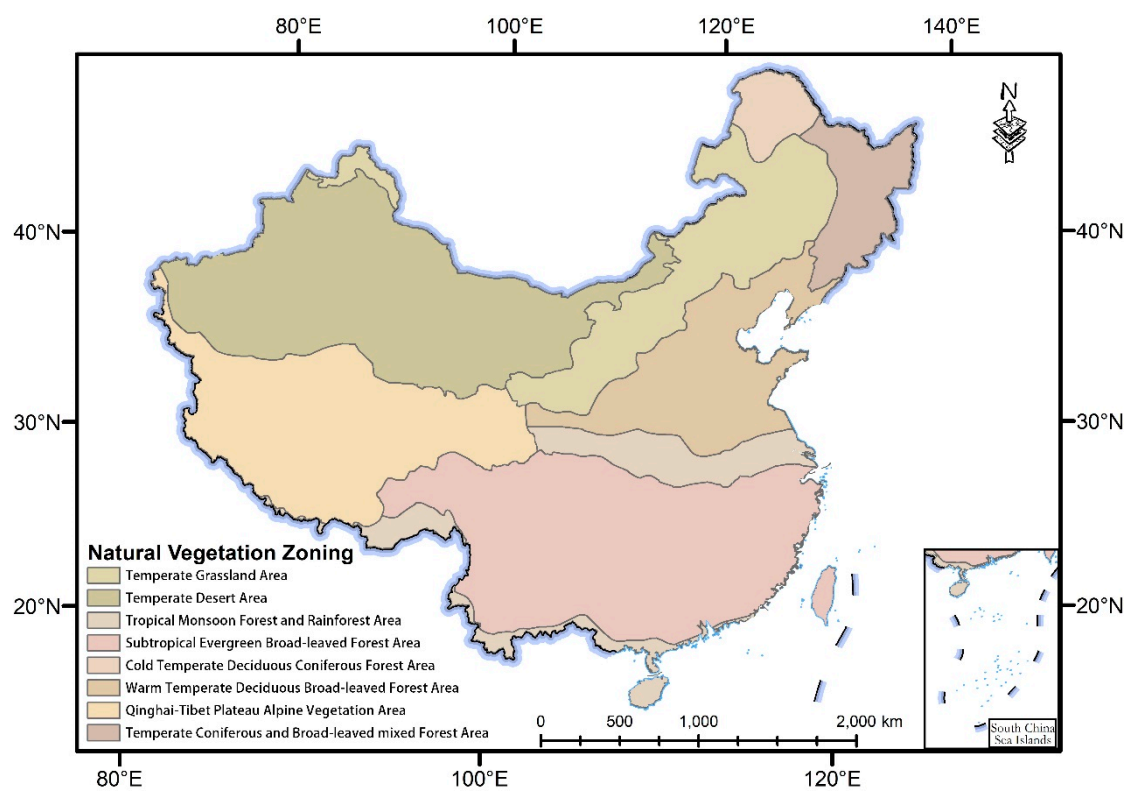

Figure S1 Natural Vegetation Zoning of China.

Supplement: s1 [file s1]
